# Supplementary material for: Assessment of the Presence of Symptoms, Individual Protection Measures (IPM) and Suspect Screening Measures (SSM) of COVID-19 in Federal Police Officers from a Regional Police Station in Brazil
Source: Preprints.org preprint supplement (doi:10.20944/preprints202008.0408.v1), 2020-08-19

Figure S1 – Supplementary file: Questionnaire applied to research participants


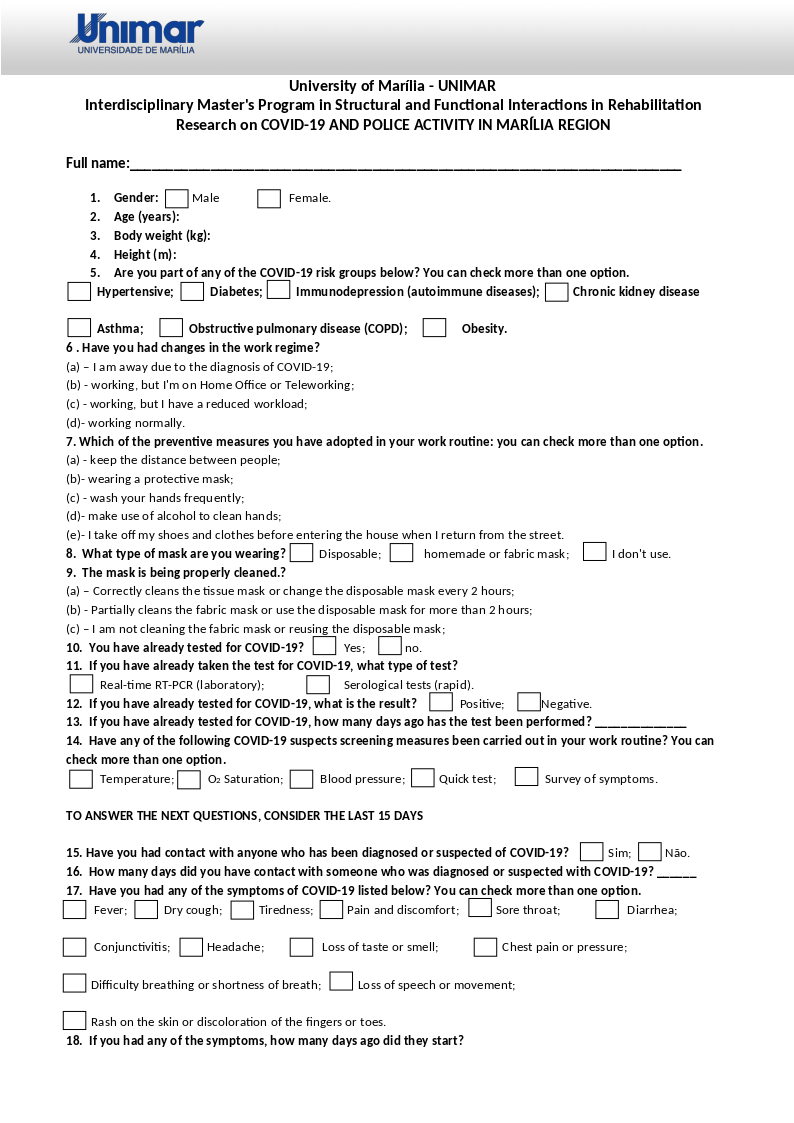


Figure S2 – Supplementary file: Term of authorization from the Chief of the Federal Police of Marília (São Paulo, Brazil)


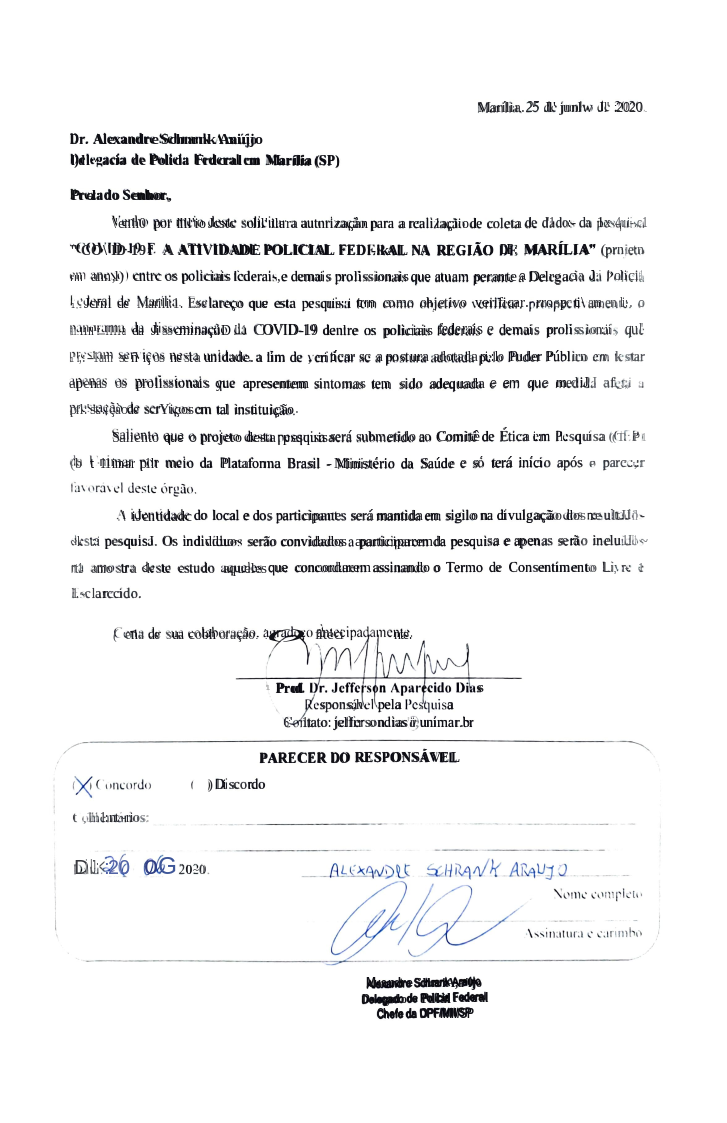

Supplement: Supplementary file 1 [file supplementary]
